# Supplementary material
Source: PubMed Central journal article supplement (PMC4141647)
Supplement: NIHMS553369-supplement-01.pdf [file NIHMS553369-supplement-01.pdf]

Table S1. Number of antihypertensive medication classes being taken and percent of REasons for Geographic And Racial Differences in Stroke (REGARDS) participants taking each class of medication

|                                                  | No treatment-resistant hypertension<br>(n=7,827) | Treatment-resistant hypertension<br>(n=2,147) |
|--------------------------------------------------|--------------------------------------------------|-----------------------------------------------|
| Antihypertensive medication classes<br>Mean (SD) | 1.8 (0.7)                                        | 3.6 (0.6)                                     |
| Aldosterone antagonist, %                        | 1.3                                              | 7.2                                           |
| Alpha blocker, %                                 | 4.2                                              | 15.2                                          |
| Angiotensin converting enzyme (ACE) inhibitor, % | 39.2                                             | 61.4                                          |
| Angiotensin receptor blocker (ARB), %            | 24.8                                             | 39.8                                          |
| Beta blocker, %                                  | 31.4                                             | 71.0                                          |
| Calcium channel blocker, %                       | 31.6                                             | 71.1                                          |
| Central acting agent, %                          | 0.2                                              | 1.1                                           |
| Diuretic, %                                      | 51.2                                             | 86.2                                          |
| Vasodilator, %                                   | 0.3                                              | 2.8                                           |
