# Supplementary material
Source: PubMed Central journal article supplement (PMC4141647)
Supplement: NIHMS553369-supplement-02.pdf [file NIHMS553369-supplement-02.pdf]

Table S2. Sensitivity analyses on the incidence rates and hazard ratios for end-stage renal disease associated with treatment-resistant hypertension among REasons for Geographic And Racial Differences in Stroke (REGARDS) study participants

|                                                                                                      | No treatment-resistant hypertension | Treatment-resistant hypertension |
|------------------------------------------------------------------------------------------------------|-------------------------------------|----------------------------------|
| <i>Limited to individuals with perfect medication adherence<sup>†</sup></i>                          |                                     |                                  |
| N (at risk)                                                                                          | 5,395                               | 1,412                            |
| ESRD events, N (%)                                                                                   | 29 (0.54)                           | 67 (4.75)                        |
| ESRD incidence rate (per 1,000 person-years)                                                         | 0.88 (0.61, 1.27)                   | 8.21 (6.46, 10.43)               |
| Hazard ratio (95% CI) for ESRD                                                                       |                                     |                                  |
| Crude                                                                                                | 1 (ref)                             | 9.36 (6.05, 14.47)               |
| Age, race, sex-adjusted                                                                              | 1 (ref)                             | 7.49 (4.81, 11.64)               |
| Multivariable adjusted <sup>1</sup>                                                                  | 1 (ref)                             | 5.50 (3.43, 8.80)                |
| <i>Including individuals with uncontrolled BP on 1 or 2 classes of antihypertensive medication</i>   |                                     |                                  |
| N (at risk)                                                                                          | 11,292                              | 2,147                            |
| ESRD events, N (%)                                                                                   | 129 (1.14)                          | 110 (5.12)                       |
| ESRD incidence rate (per 1,000 person-years)                                                         | 1.88 (1.58, 2.23)                   | 8.86 (7.35, 10.68)               |
| Hazard ratio (95% CI) for ESRD                                                                       |                                     |                                  |
| Crude                                                                                                | 1 (ref)                             | 4.73 (3.67, 6.10)                |
| Age, race, sex-adjusted                                                                              | 1 (ref)                             | 4.09 (3.16, 5.29)                |
| Multivariable adjusted <sup>1</sup>                                                                  | 1 (ref)                             | 3.15 (2.39, 4.15)                |
| <i>Including adjustment for albumin-to-creatinine ratio and estimated glomerular filtration rate</i> |                                     |                                  |
| N (at risk)                                                                                          | 7,827                               | 2,147                            |
| ESRD events, N (%)                                                                                   | 42 (0.54)                           | 110 (5.12)                       |
| ESRD incidence rate (per 1,000 person-years)                                                         | 0.88 (0.65, 1.19)                   | 8.86 (7.35, 10.68)               |
| Hazard ratio (95% CI) for ESRD                                                                       |                                     |                                  |
| Crude                                                                                                | 1 (ref)                             | 10.06 (7.05, 14.36)              |
| Age, race, sex-adjusted                                                                              | 1 (ref)                             | 8.34 (5.82, 11.96)               |
| Multivariable adjusted <sup>2</sup>                                                                  | 1 (ref)                             | 1.39 (0.92, 2.11)                |

ESRD: end-stage renal disease

<sup>†</sup> Defined as a score of 0 on the 4-item Morisky medication adherence scale

<sup>‡</sup> Defined as systolic or diastolic BP that remains above goal despite concurrent use of  $\geq 2$  antihypertensive medication classes plus a diuretic or use of  $\geq 3$  antihypertensive medication classes plus a diuretic, regardless of BP level

<sup>1</sup>Adjusted for age, race, sex, region of residence, education, income, physical activity, current smoking, alcohol use, statin use, waist circumference, diabetes, total cholesterol, high-density lipoprotein cholesterol, c-reactive protein, history of myocardial infarction, and history of stroke.

<sup>2</sup>Adjusted for model 1 plus albumin-to-creatinine ratio (log transformed) and estimated glomerular filtration rate.
