# Supplementary material
Source: PubMed Central journal article supplement (PMC4141647)
Supplement: NIHMS553369-supplement-03.pdf [file NIHMS553369-supplement-03.pdf]

Table S3. Characteristics of REasons for Geographic And Racial Differences in Stroke (REGARDS) study participants without treatment-resistant hypertension and with controlled versus uncontrolled treatment-resistant hypertension

|                                    | No treatment-resistant hypertension<br>(n=7,827) | Treatment-resistant hypertension with controlled BP<br>(n=564) | Treatment-resistant hypertension with uncontrolled BP<br>(n=1,583) |
|------------------------------------|--------------------------------------------------|----------------------------------------------------------------|--------------------------------------------------------------------|
| Age, years                         | 65.4 (8.9)                                       | 67.4 (8.5)                                                     | 67.6 (8.6)                                                         |
| Female gender, %                   | 58.9                                             | 48.9                                                           | 50.7                                                               |
| Black race, %                      | 45.3                                             | 54.1                                                           | 60.8                                                               |
| Region, %                          |                                                  |                                                                |                                                                    |
| Non-belt                           | 42.4                                             | 43.6                                                           | 45.0                                                               |
| Belt                               | 35.2                                             | 33.0                                                           | 35.0                                                               |
| Buckle                             | 22.4                                             | 23.4                                                           | 20.0                                                               |
| Income <\$20,000, %                | 18.2                                             | 20.6                                                           | 26.5                                                               |
| Less than high school education, % | 13.0                                             | 16.7                                                           | 20.8                                                               |
| Current smoking, %                 | 12.8                                             | 10.7                                                           | 12.4                                                               |
| Current alcohol use, %             | 34.5                                             | 33.0                                                           | 30.3                                                               |
| Perfect medication adherence, %    | 70.6                                             | 69.6                                                           | 66.2                                                               |
| Physical activity, %               |                                                  |                                                                |                                                                    |
| 4+ times per week                  | 27.8                                             | 24.2                                                           | 23.8                                                               |
| 1 to 3 times per week              | 35.9                                             | 32.7                                                           | 33.5                                                               |
| None                               | 36.3                                             | 43.1                                                           | 42.7                                                               |
| Waist circumference, cm            | 97.6 (14.8)                                      | 104.1 (16.0)                                                   | 104.2 (16.3)                                                       |
| Statin use, %                      | 42.2                                             | 56.9                                                           | 51.0                                                               |
| Diabetes, %                        | 24.7                                             | 44.2                                                           | 46.1                                                               |
| History of MI, %                   | 14.4                                             | 28.0                                                           | 24.1                                                               |
| History of stroke, %               | 7.5                                              | 12.6                                                           | 13.7                                                               |
| Total cholesterol, mg/dL           | 186.0 (38.7)                                     | 172.5 (36.9)                                                   | 183.3 (39.1)                                                       |
| HDL-cholesterol, mg/dL             | 50.9 (15.8)                                      | 47.2 (15.1)                                                    | 48.6 (15.0)                                                        |
| C-reactive protein, mg/L           | 2.5 (1.1, 5.7)                                   | 2.7 (1.2, 5.9)                                                 | 3.1 (1.3, 6.7)                                                     |
| Systolic BP, mmHg                  | 122.4 (9.8)                                      | 122.7 (10.6)                                                   | 147.5 (14.9)                                                       |
| Diastolic BP, mmHg                 | 74.3 (7.7)                                       | 72.2 (8.6)                                                     | 82.5 (10.9)                                                        |
| eGFR, mL/min/1.73m <sup>2</sup>    | 84.2 (19.5)                                      | 73.8 (22.6)                                                    | 75.1 (24.3)                                                        |
| ACR, mg/g                          | 7.0 (4.6, 12.5)                                  | 8.7 (4.9, 17.1)                                                | 27.7 (8.9, 109.0)                                                  |

MI: myocardial infarction; HDL: high-density lipoprotein; eGFR: estimated glomerular filtration rate; ACR: albumin-to-creatinine ratio

Numbers in table are mean (standard deviation) or percent, except c-reactive protein and ACR, which are presented as median (25<sup>th</sup> percentile, 75<sup>th</sup> percentile).
