# Supplementary material
Source: PubMed Central journal article supplement (PMC4141647)
Supplement: NIHMS553369-supplement-04.pdf [file NIHMS553369-supplement-04.pdf]

Table S4. Hazard ratios for incident end-stage renal disease associated with uncontrolled blood pressure among REasons for Geographic And Racial Differences in Stroke (REGARDS) study participants with treatment-resistant hypertension

|                                              | Treatment-resistant hypertension with controlled BP | Treatment-resistant hypertension with uncontrolled BP |
|----------------------------------------------|-----------------------------------------------------|-------------------------------------------------------|
| N (at risk)                                  | 564                                                 | 1,583                                                 |
| ESRD events, N (%)                           | 13 (2.30)                                           | 97 (6.13)                                             |
| ESRD incidence rate (per 1,000 person-years) | 3.89 (2.26, 6.70)                                   | 10.68 (8.75, 13.04)                                   |
| Hazard ratio (95% CI) for ESRD               |                                                     |                                                       |
| Crude                                        | 1 (ref)                                             | 2.75 (1.54, 4.90)                                     |
| Age, race, sex-adjusted                      | 1 (ref)                                             | 2.59 (1.45, 4.63)                                     |
| Multivariable adjusted <sup>1</sup>          | 1 (ref)                                             | 2.69 (1.49, 4.86)                                     |

ESRD: end-stage renal disease; BP: blood pressure

<sup>1</sup> Adjusted for age, race, sex, region of residence, education, income, physical activity, current smoking, alcohol use, waist circumference, diabetes, total cholesterol, high-density lipoprotein cholesterol, c-reactive protein, history of myocardial infarction, and history of stroke.
